# Supplementary material for: Novel eco-friendly extraction of high purity Eucommia ulmoides gum via composite enzyme hydrolysis pretreatment combined with a PEG-4000 aqueous solvent biphasic system
Source: Royal Society of Chemistry journal article supplement (doi:10.1039/d5nj00746a), 2025-01-01
Supplement: d5nj00746a1.pdf [file d5nj00746a1.pdf]

**Table S1**

Comparisons of EUG extraction yield in literatures and this work.

| Organs   | Extraction procedures                                                                                                                                                                                            | Yield (%) | References |
|----------|------------------------------------------------------------------------------------------------------------------------------------------------------------------------------------------------------------------|-----------|------------|
| Bark     | Petroleum ether extraction with solid liquid ratio of 1:30 g/mL at 75 °C for 30 min.                                                                                                                             | 10.0      | 42         |
| Bark     | Soaked in 1% NaOH at 70 °C for 2 h, 0.0333 g/mL cellulase hydrolysis at 50 °C for 4 h with a 120 r/min shaker, petroleum ether extraction with solid to liquid ratio of 1:15 g/mL at 80 °C for 2 h.              | 2.5       | 43         |
| Bark     | Immersing EtOH for 60 h, then EtOH Soxhlet extraction for 20 h, followed by hexane extraction for 20 h under N <sub>2</sub> .                                                                                    | 8.70      | 44         |
| Leaf     | Ethanol extraction at 120°C for 10 h, and then toluene extraction at 150 °C for 12 h.                                                                                                                            | 4.0       | 45         |
| Leaf     | Distilled water extraction at 60 °C for 180 min, 1 M NaOH with a solid-liquid ratio of 1:20 g/mL at 75 °C for 3 h, 20 PFU/g cellulase hydrolysis at 50 °C for 96 h, petroleum ether extractuon at 80 °C for 2 h. | 2.0       | 46         |
| Leaf     | Acetone and toluene extraction with a solid-liquid ratio of 1:15 g/mL for 10 h                                                                                                                                   | 4.3       | 47         |
| Pericarp | Grounding into powder, petroleum ether extraction at 85 °C for 12 h.                                                                                                                                             | 12.0      | 48         |
| Pericarp | Grounding 2.0 mm powder, toluene extraction with 1:25 g mL <sup>-1</sup> at 75 °C for 24 h.                                                                                                                      | 13.8      | 49         |
| Pericarp | Limonene extraction with 14 mL g <sup>-1</sup> at 128 °C for 1.7 h                                                                                                                                               | 8.11      | 50         |
| Pericarp | Composite enzyme pretreatment assisted with PEG-4000 aqueous solvent biphasic system                                                                                                                             | 15.26     | This work  |

**Table S2** $T_g$ ,  $T_m$  and  $\Delta H_m$  of EUG-1, EUG-2 and EUG-3.

| Samples | $T_g$ (°C) | $T_m$ (°C) |         | $\Delta H_m$ (J/g) |
|---------|------------|------------|---------|--------------------|
|         |            | $\alpha$   | $\beta$ |                    |
| EUG-1   | -74.2      | 51.2       | 61.5    | 54.9               |
| EUG-2   | -74.5      | 43.2       | 63.4    | 67.9               |
| EUG-3   | -74.7      | 42.7       | 62.2    | 60.7               |

**Table S3**

Tensile testing results of EUG-1, EUG-2 and EUG-3

| Sample | Tensile strength (Mpa) | Elongation at break (%) | Elasticity modulus (Mpa) |
|--------|------------------------|-------------------------|--------------------------|
| EUG-1  | $17.09 \pm 0.75$       | $325.39 \pm 2.81$       | $113.01 \pm 1.45$        |
| EUG-2  | $14.79 \pm 0.40$       | $240.71 \pm 1.21$       | $158.28 \pm 0.92$        |
| EUG-3  | $17.86 \pm 0.79$       | $367.85 \pm 2.33$       | $153.55 \pm 2.62$        |
